# Supplementary material for: Significant Benefits of Environmentally Friendly Hydrosols from Tropaeolum majus L. Seeds with Multiple Biological Activities
Source: MDPI journal article supplement (doi:10.3390/plants12223897), 2023-11-18
Supplement: s1 [file s1]

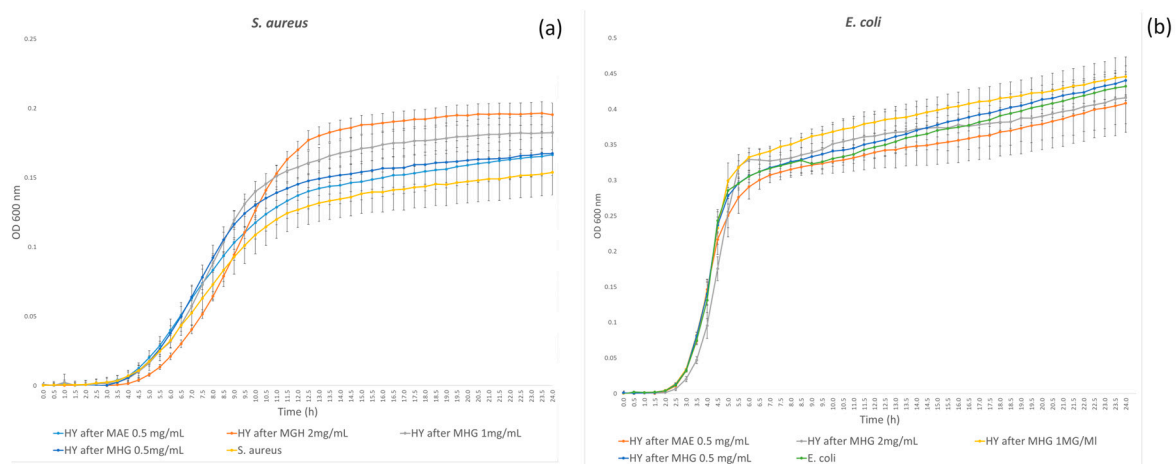

**Figure S1.** Effects of hydrosols of *T. majus* in different concentrations (mg/mL) on the growth of *S. aureus* (a) and *E. coli* (b). Cultures were aerobically incubated for 24 h at 37 °C. Negative controls were deducted from the obtained results. Average values of A600 nm  $\pm$  SD are shown.
